# Supplementary material for: Metabolomics and Microbiomics Reveal Impacts of Rhizosphere Metabolites on Alfalfa Continuous Cropping
Source: PubMed Central journal article supplement (PMC9069006; doi:10.3389/fmicb.2022.833968), 2022-04-21

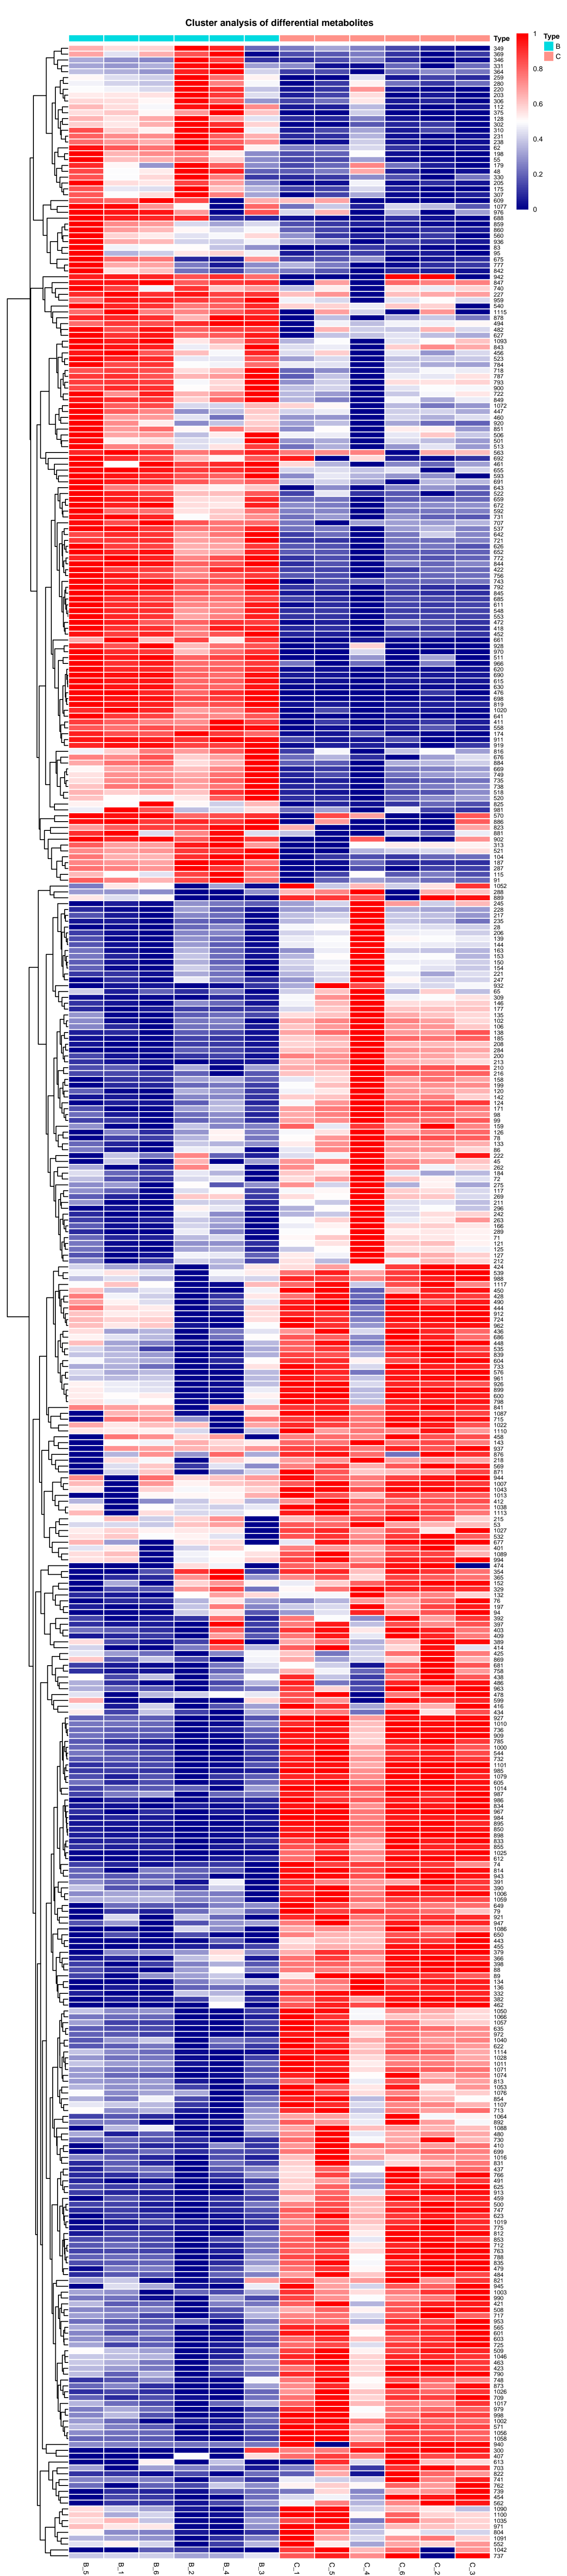

Supplement: Data_Sheet_3.pdf [file Data_Sheet_3.pdf]
